# Supplementary material for: MicroRNA Sequencing Analysis in Obstructive Sleep Apnea and Depression: Anti-Oxidant and MAOA-Inhibiting Effects of miR-15b-5p and miR-92b-3p through Targeting PTGS1-NF-κB-SP1 Signaling
Source: MDPI journal article supplement (doi:10.3390/antiox10111854), 2021-11-22
Supplement: s1 [file s1]

# microRNA sequencing analysis in obstructive sleep apnea and depression: anti-oxidant and MAOA-inhibiting effects of miR-15b-5p and miR-92b-3p through targeting PTGS1-NF-κB-SP1 signaling

Yung-Che Chen, Po-Yuan Hsu, Mao-Chang Su, Ting-Wen Chen, Chang-Chun Hsiao, Chien-Hung Chin, Chia-Wei Liou, Po-Wen Wang, Ting-Ya Wang, Yong-Yong Lin, Chiu Ping Lee, Meng-Chih Lin

## Supplementary information

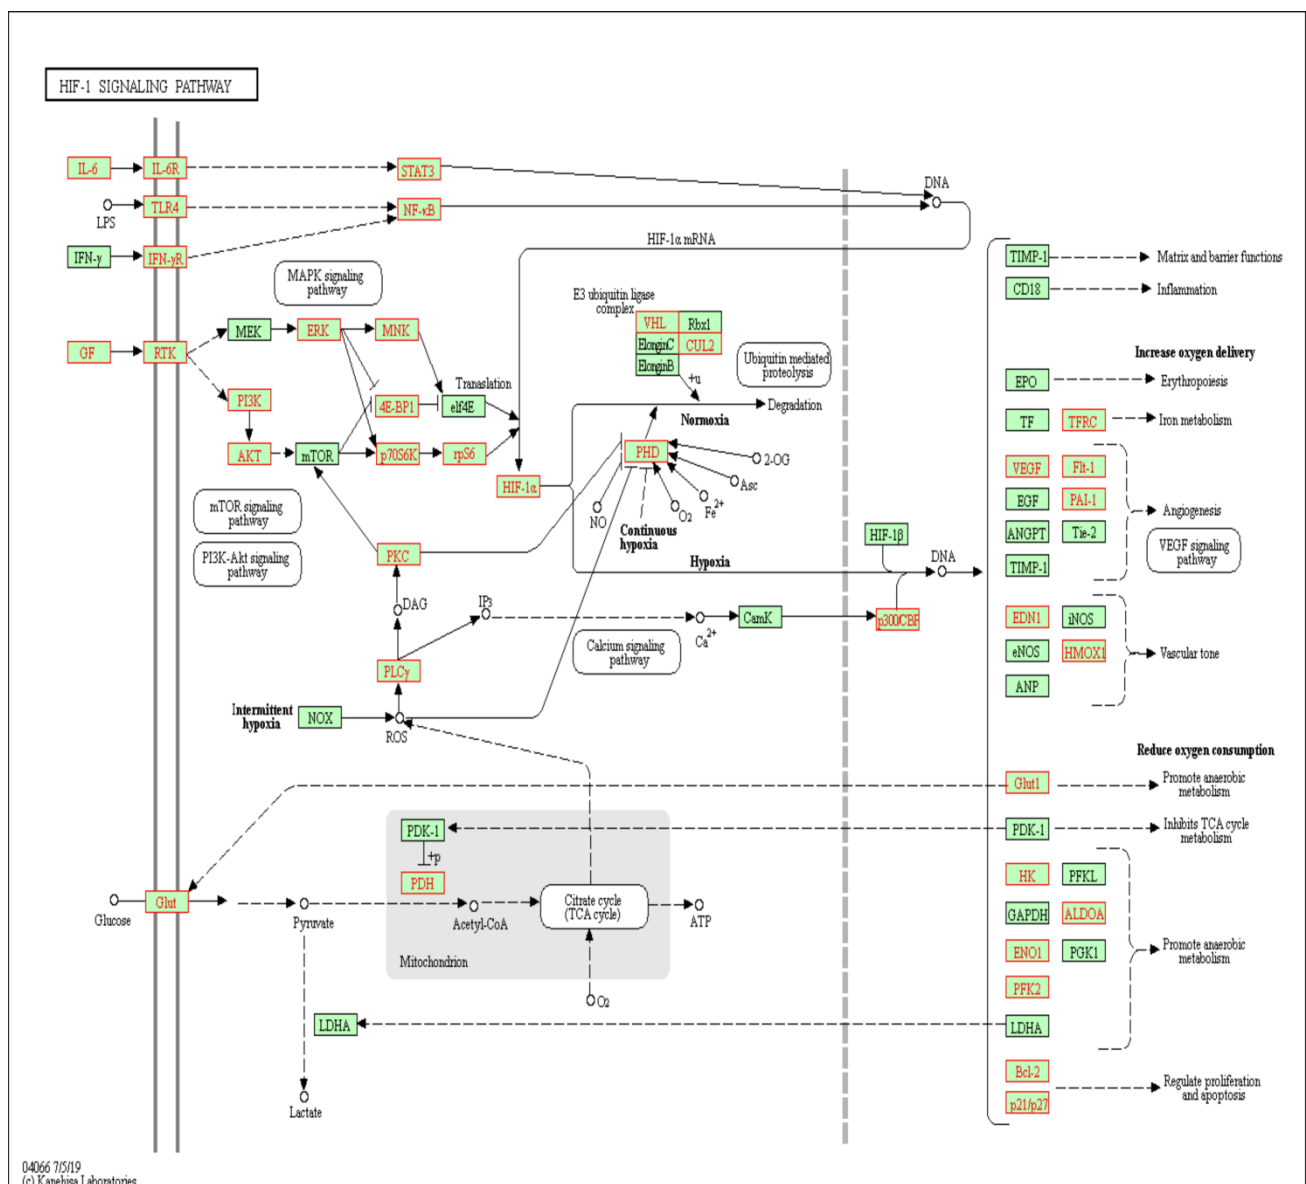

**Supplementary Figure S1.** The KEGG pathway of HIF-1 signaling is identified by over-representation analysis with the gene list derived from the validated target genes of the 22 OSA-related miRNAs (see Methods). The FDR-adjusted p-value of the pathways is 4.0E-4. Predicted target genes are shown in red letters and boxes with red lines.

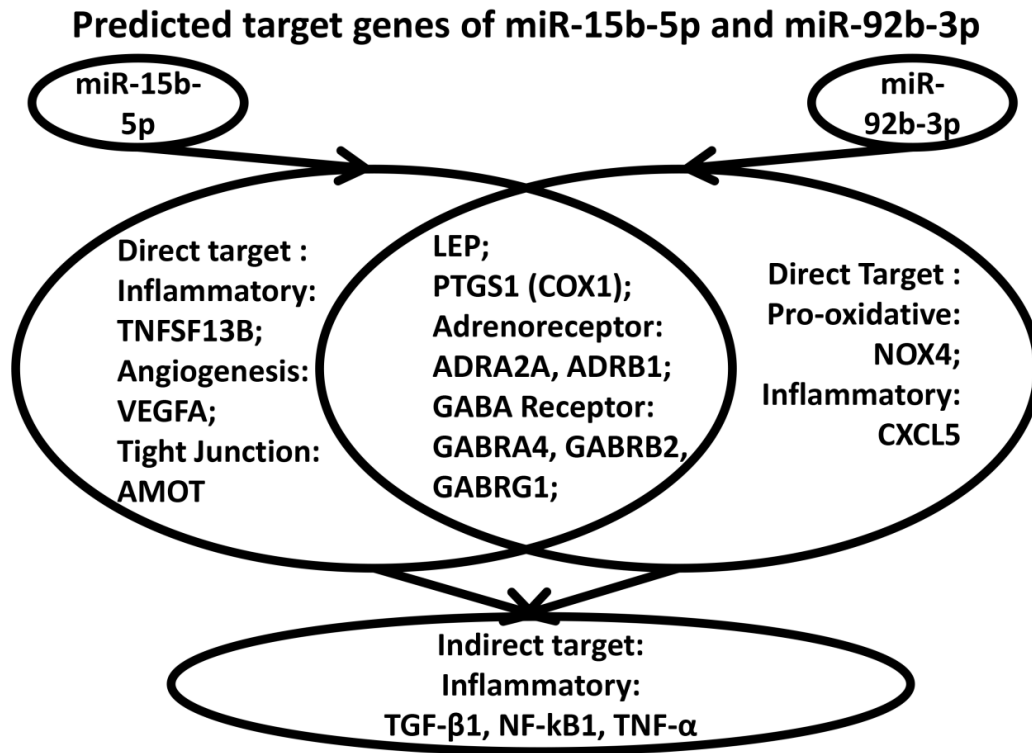

**Supplementary Figure S2.** Predicted direct and indirect target genes of miR-15b-5p and miR-92b-3p based on IPA and miRbase database.

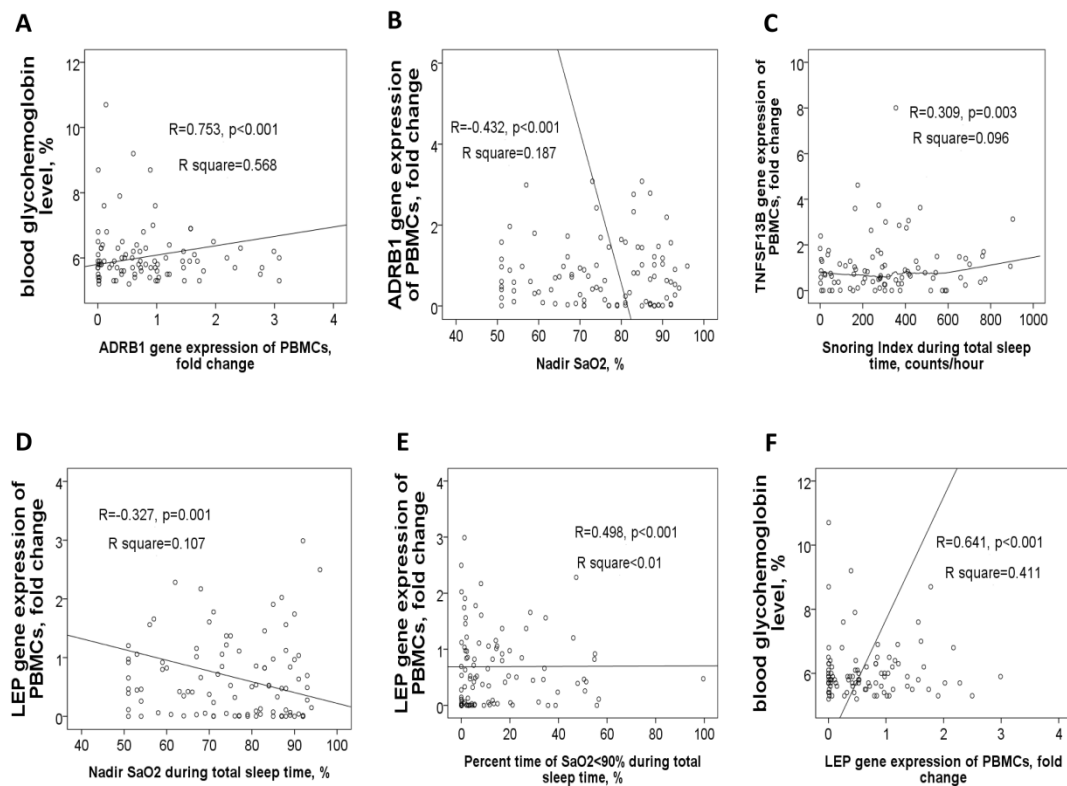

**Supplementary Figure S3.** Correlations of the predicted target gene expressions of miR-15b-5p/miR-92b-3p with sleep parameters and blood sugar control. Both (A) ADRB1 and (B) GABRB2 gene expressions were positively correlated with blood glycohemoglobin (HbA1c) levels. (C) TNFSF13B gene expression was positively correlated with snoring index. LEP gene expression was negatively correlated with (D) nadir SaO<sub>2</sub>, and positively correlated with (E) percent time of SaO<sub>2</sub><90% and (F) HbA1c.

**A**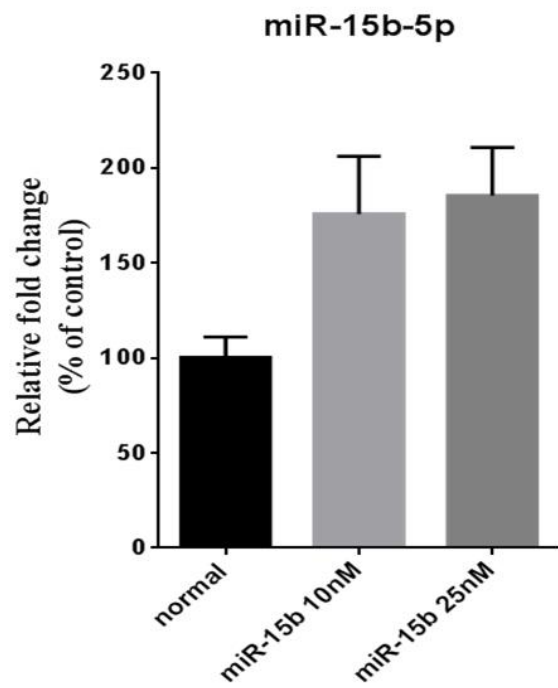**B**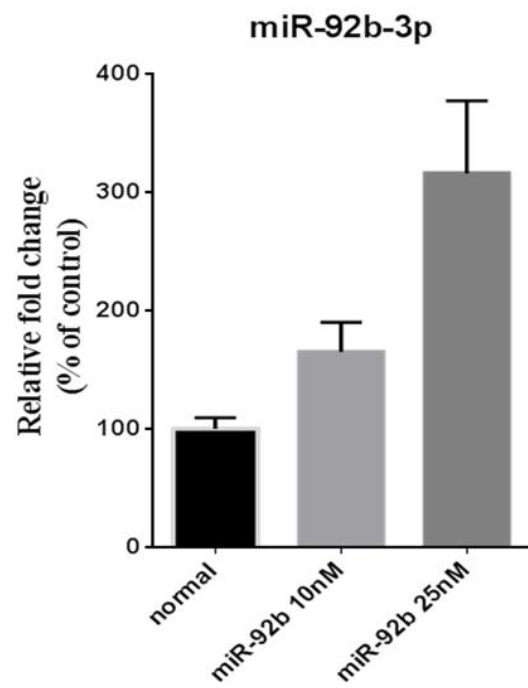

**Supplementary Figure S4. Transfection efficiency of miR-15b-5p mimic and miR-92b-3p mimic in human umbilical vein endothelial cells (HUVEC).** Transfection with either (A) miR-15b-5p mimic or (B) miR-92b-3p mimic in HUVEC at 10 nM or 25 nM resulted in 1.5 to 3 fold increases in their gene expression levels as compared with that of normal scrambler control.

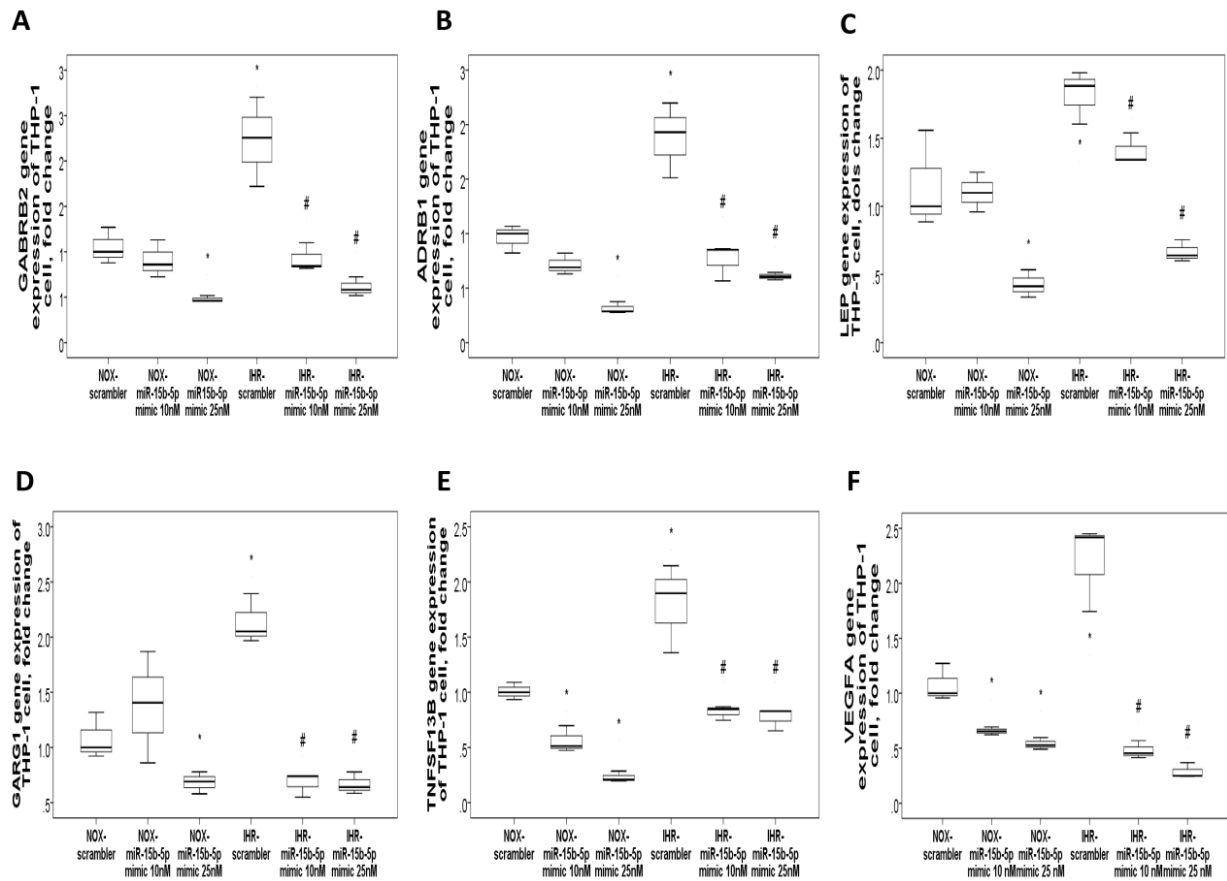

**Supplementary Figure S5.** MiR-15b-5p over-expression reversed intermittent hypoxia with re-oxygenation (IHR)-induced up-regulations of its target genes. Transfection with miR-15b-5p mimic at 25 nM in THP-1 cells reversed IHR-induced up-regulations of its predicted target genes, including (A) *GABRB2*, (B) *ADRB1*, (C) *LEP*, (D) *GARG1*, (E) *TNFSF13B*, and (F) *VEGFA*.

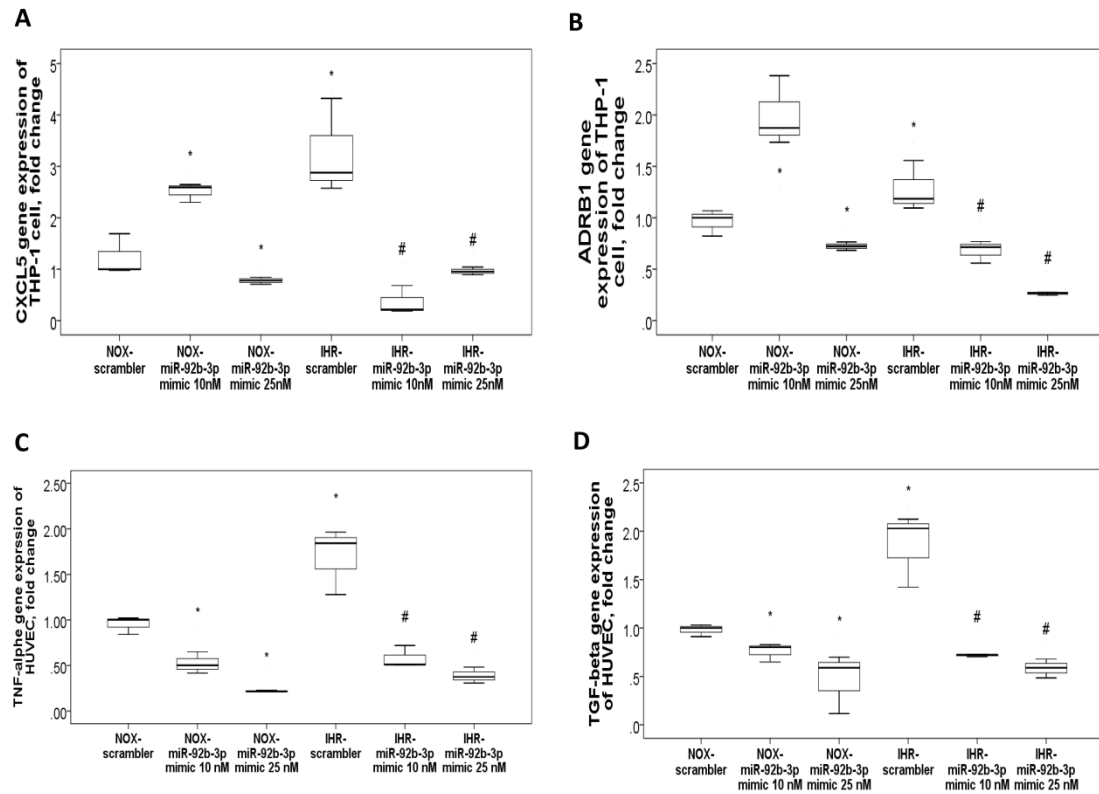

**Supplementary Figure S6.** MiR-92b-3p over-expression reversed intermittent hypoxia with re-oxygenation (IHR)-induced up-regulations of its target genes. Transfection with miR-92b-3p mimic at 25 nM in THP-1 cells reversed IHR-induced up-regulations of the (A) *CXCL5*, (B) *ADRB1*, (C) *TNF- $\alpha$* , and (D) *TGF- $\beta$*  genes.

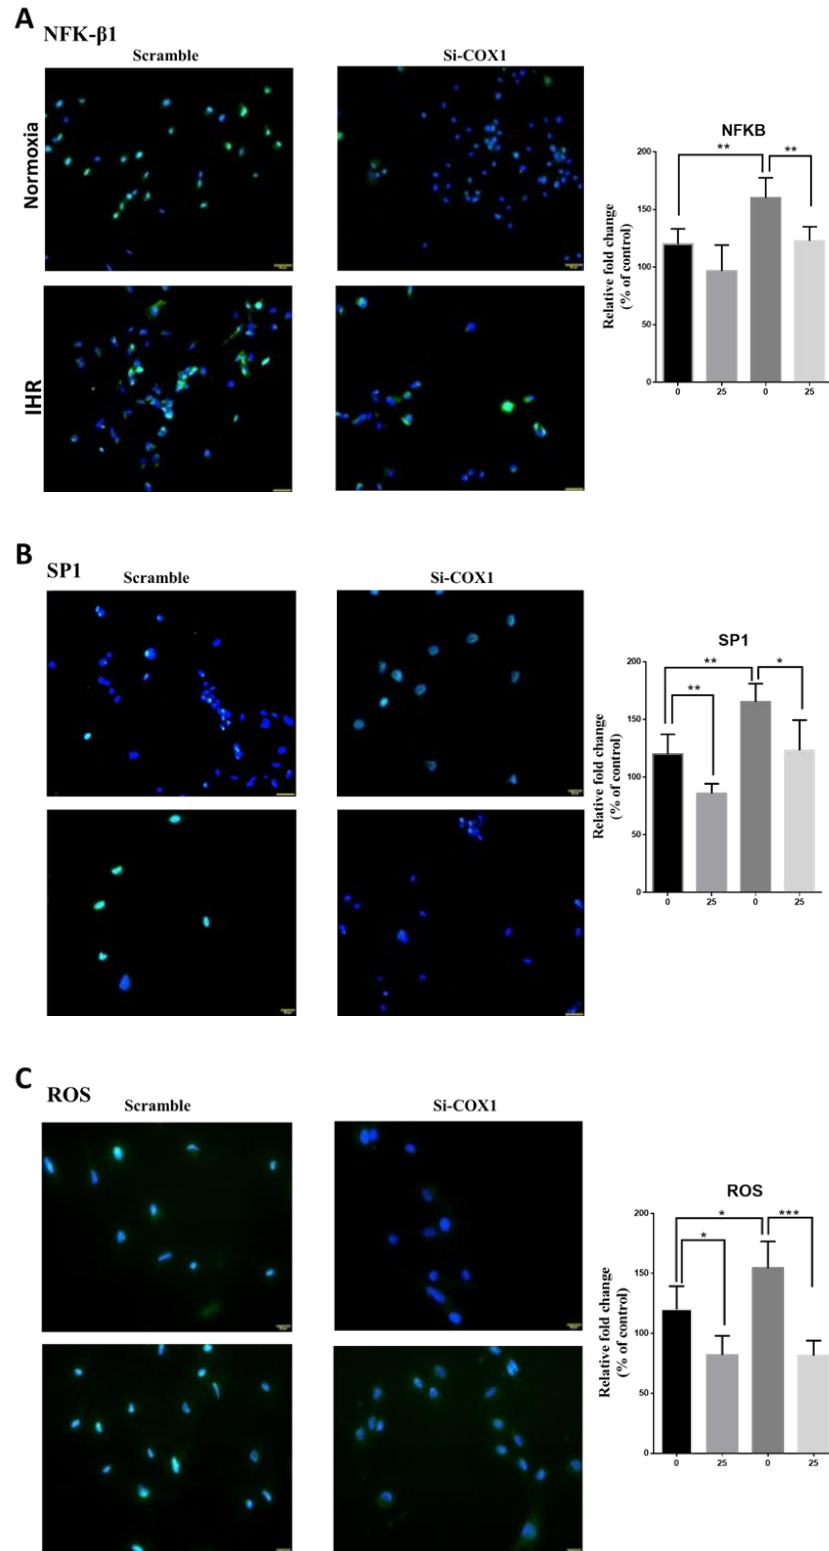

**Supplementary Figure S7.** PTGS1 (COX1) knock-down reversed intermittent hypoxia with re-oxygenation (IHR)-induced up-regulation of NF- $\kappa$ B/SP1, and oxidative stress. Representative micrographs of immunofluorescence staining in SH-SY5Y neuron cells with or without the knock-down of PTGS1 under IHR versus normoxic (NOX) condition are given for (A) NF- $\kappa$ B1, (B) SP1, and (C) reactive oxygen species (ROS). IHR resulted in over-expressions of NF- $\kappa$ B1, and SP1, and ROS over-production, all of which were re-verses with the knock-down of COX1. DAPI (blue) is used for staining the nuclei. Localizations of the three molecules are indicated in green. All the micrographs are a merge of the two staining. Quantified values are stratified based on the response to IHR stimuli and PTGS1 SiRNA transfection. Kruskal–Wallis test with post-hoc analysis was used for comparisons between four groups. \* $p < 0.05$ . \*\* $p < 0.01$ . \*\*\* $p < 0.001$ .

**Supplementary Table S1.** Probe sequences of the ten selected microRNAs and exogenous control *Caenorhabditis elegans* microRNA.

| Probe ID   | Gene name               | Probe sequence          |
|------------|-------------------------|-------------------------|
| 478293_mir | <i>cel-miR-39</i>       | UCACCGGGUGUAAAUCAGCUUG  |
| 479802_mir | <i>hsa-miR-4433b-3p</i> | CAGGAGUGGGGGUGGGACGU    |
| 478511_mir | <i>hsa-miR-133a-3p</i>  | UUUGGUCCCCUUAACCAGCUG   |
| 477984_mir | <i>hsa-miR-223-5p</i>   | CGUGUAUUUGACAAGCUGAGUU  |
| 478313_mir | <i>hsa-miR-15b-5p</i>   | UAGCAGCACAUCAUGGUUUACA  |
| 477823_mir | <i>hsa-miR-92b-3p</i>   | UAUUGCACUCGUCCCGGCCUCC  |
| 477824_mir | <i>hsa-miR-148b-3p</i>  | UCAGUGCAUCACAGAACUUUGU  |
| 477860_mir | <i>hsa-miR-16-5p</i>    | UAGCAGCACGUAAAUAUUGGCG  |
| 478324_mir | <i>hsa-miR-335-5p</i>   | UCAAGAGCAAUAACGAAAAAUGU |
| 478575_mir | <i>hsa-let-7a-5p</i>    | UGAGGUAGUAGGUUGUAUAGUU  |
| 477916_mir | <i>hsa-miR-145-5p</i>   | GUCCAGUUUUCCCAGGAAUCCCU |

**Supplementary Table S2.** Primer sequences of the predicted target mRNAs used for quantitative reverse-transcriptase polymerase chain reaction.

| Gene Name        |         | Sequence (5'-3')            |
|------------------|---------|-----------------------------|
| <i>TGF-beta</i>  | Forward | CAA GGG CTA CCA TGC CAA CT  |
|                  | Reverse | AGG GCC AGG ACC TTG CTG     |
| <i>TNF-alpha</i> | Forward | GAGGCCAAGCCCTGGTATG         |
|                  | Reverse | CGGGCCGATTGATCTCAGC         |
| <i>BACE1</i>     | Forward | ACCAACCTTCGTTTGCCCAA        |
|                  | Reverse | TCTCCTAGCCAGAAACCATCAG      |
| <i>JNK</i>       | Forward | TGTGTGGAATCAAGCACCTTC       |
|                  | Reverse | AGGCGTCATCATAAAACTCGTTC     |
| <i>GSK3-beta</i> | Forward | GGCAGCATGAAAGTTAGCAGA       |
|                  | Reverse | GGCGACCAGTTCTCCTGAATC       |
| <i>INSR</i>      | Forward | CATCCGGGGATCACGACTG         |
|                  | Reverse | ATCAGGTTGTAGAGGCCGAGT       |
| <i>NF-kB1</i>    | Forward | GAAGCACGAATGACAGAGGC        |
|                  | Reverse | GCTTGGCGGATTAGCTCTTTT       |
| <i>ADRB1</i>     | Forward | ATCGAGACCCTGTGTGTCATT       |
|                  | Reverse | GTAGAAGGAGACTACGGACGAG      |
| <i>ADRA2A</i>    | Forward | AGAAGTGGTACGTCATCTCGT       |
|                  | Reverse | CGCTTGGCGATCTGGTAGA         |
| <i>CXCL5</i>     | Forward | AGCTGCGTTGCGTTTGTTTAC       |
|                  | Reverse | TGGCGAACACTTGACAGATTAC      |
| <i>GABRG1</i>    | Forward | AAAAAGCCCTCCGTAGAAGTG       |
|                  | Reverse | AGTTGAGTTCCGTAACCCTACA      |
| <i>GABRB2</i>    | Forward | GGGTGCCTGATACCTATTTCTT      |
|                  | Reverse | GCGAATCATGCGGTTCTTAACA      |
| <i>GABRA4</i>    | Forward | ACAATGAGACTCACCATAAGTGC     |
|                  | Reverse | AACTCCCGAATTTCAAAGGGC       |
| <i>PTGS1</i>     | Forward | CGCCAGTGAATCCCTGTTGTT       |
|                  | Reverse | AAGGTGGCATTGACAAACTCC       |
| <i>PTGER4</i>    | Forward | CCGGCGGTGATGTTTCATCTT       |
|                  | Reverse | CCCACATACCAGCGGTGAGAA       |
| <i>TNFSF13B</i>  | Forward | GGGAGCAGTCACGCCTTAC         |
|                  | Reverse | GATCGGACAGAGGGGCTTT         |
| <i>LEP</i>       | Forward | TGCCTTCCAGAAACGTGATCC       |
|                  | Reverse | CTCTGTGGAGTAGCCTGAAGC       |
| <i>AMOT</i>      | Forward | CCTTAGAAGGAAGGCTGAGAACT     |
|                  | Reverse | GAGAAGAAGTAGGGCTGTGAGG      |
| <i>NOX4</i>      | Forward | CAG ATG TTG GGG CTA GGA TTG |
|                  | Reverse | GAG TGT TCG GCA CAT GGG TA  |
| <i>VEGFA</i>     | Forward | AGGGCAGAATCATCACGAAGT       |
|                  | Reverse | AGGGTCTCGATTGGATGGCA        |

**Supplementary Table S3.** Enriched ingenuity pathway analysis for predicted target genes of the 22 differentially expressed miRNA.

| Ingenuity Canonical Pathways                                                  | -log(B-H p-value)* | Ratio | Molecules: predicted target gene                                                                                                                                                                                                                                                                                                                                                                                                                                                            |
|-------------------------------------------------------------------------------|--------------------|-------|---------------------------------------------------------------------------------------------------------------------------------------------------------------------------------------------------------------------------------------------------------------------------------------------------------------------------------------------------------------------------------------------------------------------------------------------------------------------------------------------|
| Senescence Pathway                                                            | 19.6               | 0.254 | ACVR1B,ACVR2A,ACVR2B,AKT3,ANAPC13,ASXL1,ASXL2,ATM,BMPR2,BRAF,CALM1 (includes others),CCNB1,CCND1,CDC23,CDC27,CDK6,CDKN1A,CDKN1B,CREBBP,CXCL8,DHCR24,E2F1,E2F3,E2F5,E2F7,EP300,HBP1,HIPK2,IL6,JUN,KRAS,MAP2K4,MAP3K7,MAPK1,MAPK14,MAPKAPK5,MDM2,NF1,NFAT5,NFATC3,NFKB1,NRAS,PARP1,PHF19,PIK3C2A,PIK3C2B,PIK3CA,PIK3R1,PPP2R2A,PPP2R5C,PTEN,RAP2A,RASSF5,RBL2,RPS6KA5,SERPINE1,SMAD2,SMAD3,SMAD4,SMAD5,SMAD7,SOD2,SQSTM1,TGFB1,TGFB1,TGFB2,TGFB3,TP53,ZFP36L1                                 |
| Molecular Mechanisms of Cancer                                                | 18                 | 0.209 | AKT3,APC,APH1A,ARHGEF10,ATM,BCL2,BCL2L11,BMP2,BMPR2,BRAF,CASP7,CBL,CCND1,CCND2,CDH1,CDK12,CDK19,CDK6,CDKN1A,CDKN1B,CREBBP,CRK,CTNNA1,CTNNB1,CTNND1,E2F1,E2F3,E2F5,E2F7,EP300,FAS,FOS,FOXO1,FZD6,GNAI3,GNAI3,GSK3B,HIF1A,HIPK2,ITGA2,ITGA3,ITGA5,ITGA6,ITGAV,JUN,KRAS,MAP2K4,MAP3K7,MAPK1,MAPK14,MAPK8,MDM2,MYC,NF1,NFKB1,NRAS,PIK3C2A,PIK3C2B,PIK3CA,PIK3R1,PMAIP1,PRKAR2A,PRKCB,PRKDC,RAC1,RAP2A,RASA1,RBPJ,RHOB,SMAD2,SMAD3,SMAD4,SMAD5,SMAD7,TAB2,TCF3,TGFB1,TGFB1,TGFB2,TP53,WNT5A,XIAP |
| p53 Signaling                                                                 | 12.7               | 0.337 | AKT3,ATM,BCL2,BIRC5,CCND1,CCND2,CCNG1,CDKN1A,CSNK1D,CTNNB1,E2F1,EP300,FAS,GSK3B,HIF1A,HIPK2,JMY,JUN,MAPK14,MAPK8,MDM2,MDM4,PIK3C2A,PIK3C2B,PIK3CA,PIK3R1,PMAIP1,PRKDC,PTEN,THBS1,TNFRSF10B,TP53,TP53INP1                                                                                                                                                                                                                                                                                    |
| Estrogen Receptor Signaling                                                   | 11.4               | 0.19  | AKT3,ATF2,BCL2,CARM1,CAV1,CCND1,CDKN1A,CFL2,CREB1,CREBBP,DDX5,EGFR,EIF2B2,EP300,FOS,FOXO1,GNAI3,GNAI3,GNB1,GNG11,GSK3B,HIF1A,HSP90AA1,HSP90AB1,HSP90B1,IGF1R,JUN,KRAS,LIMK1,MAPK1,MED13,MED13L,MED6,MMP14,MYC,NCOA2,NCOA3,NCOR2,NFKB1,NR3C1,NRAS,PIK3C2A,PIK3C2B,PIK3CA,PIK3R1,PPP1R12A,PRKAA1,PRKAA2,PRKAB2,PRKAR2A,PRKCB,PRKDC,PTEN,RAP2A,RBFOX2,SOD2,SP1,TBL1XR1,TP53,TRRAP,VEGFA                                                                                                        |
| Epithelial Adherens Junction Signaling                                        | 11.4               | 0.26  | ACTB,ACTG1,ACTR2,ACTR3,ACVR1B,ACVR2A,ACVR2B,AFDN,AKT3,APC,ARPC5,BMPR2,CDH1,CLIP1,CRK,CTNNA1,CTNNB1,CTNND1,EGFR,FGFR1,KRAS,MET,MYH9,NOTCH2,NRAS,PARD3,PTEN,RAC1,RAP2A,SSX2IP,TCF3,TCF7L2,TGFB1,TGFB2,TGFB3,TUBB,VCL,WASL,YES1                                                                                                                                                                                                                                                                |
| MSP-RON Signaling In Cancer Cells Pathway                                     | 11                 | 0.271 | AKT3,ATF2,BRAF,CCND1,CREB1,CREBBP,CTNNB1,EGFR,FLNA,FOS,GSK3B,HIF1A,ITGA6,JUN,KRAS,MAPK1,MET,MYC,NFKB1,NRAS,PIK3C2A,PIK3C2B,PIK3CA,PIK3R1,RAP2A,RPS6KA3,SMAD2,SP1,STAT3,TCF3,TCF7L2,VEGFA,YWHAB,YWHAQ,YWHAZ                                                                                                                                                                                                                                                                                  |
| Regulation Of The Epithelial Mesenchymal Transition By Growth Factors Pathway | 10.7               | 0.229 | AKT3,BRAF,CDH1,EGFR,FGF2,FGFR1,FOS,FOXO1,FRS2,GSK3B,HMG A2,ID2,IL6,JUN,KRAS,LATS1,LATS2,MAP2K4,MAP3K7,MAPK1,MAPK14,MAPK8,MET,NFKB1,NRAS,PARD6B,PIK3C2A,PIK3C2B,PIK3CA,PIK3R1,RAC1,RAP2A,SMAD2,SMAD3,SMAD4,STAT3,TCF3,TGFB1,TGFB1,TGFB2,TNFSF9,WWTR1,ZEB1                                                                                                                                                                                                                                    |
| HGF Signaling                                                                 | 10.4               | 0.277 | AKT3,ATF2,CCND1,CDKN1A,CRKL,FOS,IL6,ITGA2,ITGA3,ITGA5,ITGA6,ITGAV,JUN,KRAS,MAP2K4,MAP3K2,MAP3K7,MAP3K8,MAP3K9,MAPK1,MAPK8,MET,NRAS,PIK3C2A,PIK3C2B,PIK3CA,PIK3R1,PRKCB,PTGS2,PXN,RAC1,RAP2A,STAT3                                                                                                                                                                                                                                                                                           |
| HOTAIR Regulatory Pathway                                                     | 10.3               | 0.244 | AEBP2,AGO1,AGO2,AGO3,AGO4,AKT3,ATXN1,CDH1,CDKN1A,COL1A1,CREBBP,CTNNB1,EP300,H3-3A/H3-3B,IRF1,JARID2,KMT2A,KMT2C,MDM2,MET,MEX3B,MMP14,MYC,NFKB1,PIK3C2A,PIK3C2B,PIK3CA,PIK3R1,PTEN,RBBP7,REST,STAT3,STK38,TCF3,TCF7L2,TGFB1,WNT5A,XIAP                                                                                                                                                                                                                                                       |
| PTEN Signaling                                                                | 10.2               | 0.257 | AKT3,BCL2,BCL2L11,BMPR2,CBL,CCND1,CDKN1A,CDKN1B,CNKSRR3,CSNK2A1,EGFR,FGFR1,FOXO1,GSK3B,IGF1R,ITGA2,ITGA3,ITGA5,                                                                                                                                                                                                                                                                                                                                                                             |



|                                                             |      |       |                                                                                                                                                                                                                                                                                         |
|-------------------------------------------------------------|------|-------|-----------------------------------------------------------------------------------------------------------------------------------------------------------------------------------------------------------------------------------------------------------------------------------------|
| TGF- $\beta$ Signaling                                      | 10.2 | 0.302 | ITGA6,ITGAV,KRAS,MAPK1,NFKB1,NRAS,NTRK2,OCRL,PIK3CA,PIK3R1,PTEN,RAC1,RAP2A,SYNJ1,TGFBR1,TGFBR2,TGFBR3,ACVR1B,ACVR2A,ACVR2B,BCL2,BMP2,BMPR2,CREBBP,EP300,FOS,JUN,KRAS,MAP2K4,MAP3K7,MAPK1,MAPK14,MAPK8,NRAS,PMEPA1,RAP2A,SER-PINE1,SKI,SMAD2,SMAD3,SMAD4,SMAD5,SMAD7,TGFB1,TGFBR1,TGFBR2 |
| ILK Signaling                                               | 9.86 | 0.222 | ACTB,ACTG1,AKT3,ATF2,BMP2,CCND1,CDH1,CFL2,CREB1,CREBBP,CTNNB1,FLNA,FOS,GSK3B,HIF1A,IRS2,IRS4,ITGB8,JUN,MAP2K4,MAPK1,MAPK8,MYC,MYH9,NFKB1,PIK3C2A,PIK3C2B,PIK3CA,PIK3R1,PPP1R12A,PPP2R2A,PPP2R5C,PTEN,PTGS2,PXN,RAC1,RHOB,RICTOR,RPS6KA5,VCL,VEGFA                                       |
| ERK/MAPK Signaling                                          | 9.86 | 0.214 | ATF2,BRAF,CREB1,CREBBP,CRK,CRKL,DUSP1,DUSP2,DUSP4,DUSP6,FOS,H3-3A/H3-3B,ITGA2,ITGA3,ITGA5,ITGA6,ITGAV,KRAS,MAPK1,MAPKAPK5,MKNK2,MYC,NRAS,PIK3C2A,PIK3C2B,PIK3CA,PIK3R1,PPP1CC,PPP1R12A,PPP2R2A,PPP2R5C,PRKAR2A,PRKCB,PXN,RAC1,RAP2A,RPS6KA5,STAT1,STAT3,TLN1,YWHAB,YWHAQ,YWHAZ          |
| PPAR $\alpha$ /RXR $\alpha$ Activation                      | 9.77 | 0.223 | ACOX1,ACVR1B,ACVR2A,ACVR2B,BMPR2,CAND1,CKAP5,CREBBP,EP300,FASN,GPD2,HSP90AA1,HSP90AB1,HSP90B1,IL6,JUN,KRAS,MAP2K4,MAP3K7,MAPK1,MAPK14,MAPK8,NCOA3,NCOR2,NFKB1,NR2C2,NRAS,PRKAA1,PRKAA2,PRKAB2,PRKAR2A,PRKCB,RAP2A,SMAD2,SMAD3,SMAD4,TGFB1,TGFBR1,TGFBR2,TGFBR3                          |
| Sumoylation Pathway                                         | 9.71 | 0.287 | ARHG-DIA,CBX4,CDH1,CREBBP,EP300,FAS,FOS,JUN,MAP2K4,MAPK8,MDM2,MYB,NFKB1,NR3C1,RAC1,RAN,RANBP2,RAN-GAP1,RHOB,SENP1,SENP5,SERBP1,SMAD4,SP1,SP3,TP53,XIAP,ZEB1,ZNF217                                                                                                                      |
| FAT10 Cancer Signaling Pathway                              | 9.3  | 0.413 | ACKR3,ACVR1B,ACVR2A,ACVR2B,AKT3,BMPR2,CTNNB1,GSK3B,IL6,NFKB1,SMAD2,SMAD3,SMAD4,STAT3,TGFB1,TGFBR1,TGFBR2,TGFBR3,TP53                                                                                                                                                                    |
| Regulation of the Epithelial-Mesenchymal Transition Pathway | 9.02 | 0.209 | AKT3,APC,APH1A,BRAF,CDH1,CTNNB1,EGFR,FGF2,FGFR1,FRS2,FZD6,GSK3B,HIF1A,HMGA2,ID2,KRAS,MAP2K4,MAPK1,MET,NFKB1,NOTCH2,NRAS,PARD6B,PIK3C2A,PIK3C2B,PIK3CA,PIK3R1,RAP2A,RBPJ,SMAD2,SMAD3,SMAD4,STAT3,TCF3,TCF7L2,TGFB1,TGFBR1,TGFBR2,WNT5A,ZEB1                                              |
| HIF1 $\alpha$ Signaling                                     | 8.91 | 0.204 | AKT3,BRAF,CCNG2,CDKN1A,CREBBP,EGLN1,EP300,FGF2,HIF1A,HIF1AN,HK1,HSP90AA1,HSPA1A/HSPA1B,HSPA5,HSPA8,IL6,JUN,KRAS,MAP2K4,MAPK1,MDM2,MET,MKNK2,MMP14,NRAS,PIK3C2A,PIK3C2B,PIK3CA,PIK3R1,PKM,PRKCB,RACK1,RAN,RAP2A,SAT1,SER-PINE1,SLC2A3,STAT3,TGFB1,TP53,VEGFA                             |
| Coronavirus Pathogenesis Pathway                            | 8.91 | 0.233 | BCL2,BCL2L11,CCND1,CXCL8,E2F1,E2F3,E2F5,E2F7,EP300,FOS,IL6,JUN,KPNB1,MAP2K4,MAPK1,MAPK14,MAPK8,MAVS,NFKB1,NPM1,PTGS2,RBL2,RPS14,SER-PINE1,SMAD3,SMAD4,STAT1,STAT3,TGFB1,TGFBR1,TGFBR2,TNPO1,TNPO2,TP53                                                                                  |
| IGF-1 Signaling                                             | 8.82 | 0.269 | AKT3,CCN2,CSNK2A1,FOS,FOXO1,IGF1R,IRS2,JUN,KRAS,MAPK1,MAPK8,NRAS,PIK3C2A,PIK3C2B,PIK3CA,PIK3R1,PRKAR2A,PXN,RAP2A,RASA1,SOCS5,SOCS6,SOCS7,STAT3,YWHAB,YWHAQ,YWHAZ                                                                                                                        |
| Hypoxia Signaling in the Cardiovascular System              | 8.79 | 0.319 | ATF2,ATM,BIRC6,CREB1,CREBBP,CSNK1D,EP300,HIF1A,HIF1AN,HSP90AA1,HSP90AB1,HSP90B1,JUN,MDM2,PTEN,TP53,UBE2D3,UBE2G1,UBE2Q2,UBE2V2,UBE2W,UBE2Z,VEGFA                                                                                                                                        |
| Actin Cytoskeleton Signaling                                | 8.67 | 0.194 | ABI2,ACTB,ACTG1,ACTR2,ACTR3,APC,ARHGAP35,ARPC5,CFL2,CRK,CRKL,EZR,FGF2,FLNA,GNA13,GNG12,ITGA2,ITGA3,ITGA5,ITGA6,ITGAV,KRAS,LIMK1,MAPK1,MSN,MYH9,MYLK3,NCKAP1,NRAS,PIK3C2A,PIK3C2B,PIK3CA,PIK3R1,PPP1R12A,PXN,RAC1,RAP2A,SLC9A1,TIAM1,TLN1,TRIO,VCL,WASL                                  |
| PDGF Signaling                                              | 8.65 | 0.291 | ABL2,CAV1,CRK,CRKL,CSNK2A1,EIF2AK2,FOS,JUN,KRAS,MAP2K4,MAPK1,MAPK8,MYC,NRAS,OCRL,PIK3C2A,PIK3C2B,PIK3CA,PIK3R1,PRKCB,RAP2A,RASA1,STAT1,STAT3,SYNJ1                                                                                                                                      |

|                                          |      |       |                                                                                                                                                                                                                                                                                                                                                                                                                                                            |
|------------------------------------------|------|-------|------------------------------------------------------------------------------------------------------------------------------------------------------------------------------------------------------------------------------------------------------------------------------------------------------------------------------------------------------------------------------------------------------------------------------------------------------------|
| PI3K/AKT Signaling                       | 8.54 | 0.208 | AKT3,BCL2,CCND1,CDKN1A,CDKN1B,CTNNB1,FOXO1,GSK3B,HSP90AA1,HSP90AB1,HSP90B1,IL6ST,ITGA2,ITGA3,ITGA5,ITGA6,ITGAV,KRAS,MAP3K8,MAPK1,MCL1,MDM2,NFKB1,NRAS,OCRL,PIK3CA,PIK3R1,PPP2R2A,PPP2R5C,PTEN,PTGS2,RAP2A,SYNJ1,TP53,YWHAB,YWHAQ,YWHAZ                                                                                                                                                                                                                     |
| Aryl Hydrocarbon Receptor Signaling      | 8.49 | 0.234 | AHR,ATM,CCNA2,CCND1,CCND2,CDK6,CDKN1A,CDKN1B,E2F1,EP300,FAS,FOS,HSP90AA1,HSP90AB1,HSP90B1,IL6,JUN,MAPK1,MAPK8,MDM2,MYC,NCOA2,NCOA3,NCOR2,NFIA,NFIB,NFIC,NFKB1,RBL2,SPI1,TGFB1,TP53                                                                                                                                                                                                                                                                         |
| T Cell Exhaustion Signaling Pathway      | 8.41 | 0.213 | ACVR1B,ACVR2A,ACVR2B,AKT3,BMPR2,CD274,FOS,FOXO1,FOXP1,IL6,IRF4,JUN,KRAS,MAP2K4,MAPK1,MAPK8,NFAT5,NFATC3,NRAS,PIK3C2A,PIK3C2B,PIK3CA,PIK3R1,PPP2R2A,PPP2R5C,PRDM1,RAP2A,SMAD2,SMAD3,STAT1,STAT3,TGFB1,TGFB1,TGFB2,TGFB3,VEGFA                                                                                                                                                                                                                               |
| Wnt/ $\beta$ -catenin Signaling          | 8.36 | 0.212 | ACVR1B,ACVR2A,ACVR2B,AKT3,APC,BMPR2,BTRC,CCND1,CDH1,CREBBP,CSNK1A1,CSNK1D,CSNK1E,CSNK2A1,CTNNB1,EP300,FZD6,GSK3B,JUN,MAP3K7,MDM2,MYC,PPP2R2A,PPP2R5C,SOX11,SOX4,SOX5,TCF3,TCF7L2,TGFB1,TGFB1,TGFB2,TGFB3,TLE4,TP53,WNT5A                                                                                                                                                                                                                                   |
| Protein Kinase A Signaling               | 8.31 | 0.156 | AKAP10,AKAP11,AKAP9,ANAPC13,ATF2,BRAF,CALM1 (includes others),CDC23,CDC27,CREB1,CREBBP,CTNNB1,DUSP1,DUSP2,DUSP3,DUSP4,DUSP5,DUSP6,FLNA,GDE1,GNA13,GNAI3,GNB1,GNG11,GNG12,GSK3B,H3-3A/H3-3B,ITPR1,MAPK1,MYLK3,NFAT5,NFATC3,NFKB1,PALM2AKAP2,PDE3A,PDE4D,PDE7A,PPP1CC,PPP1R12A,PRKAR2A,PRKCB,PTEN,PTGS2,PTP4A1,PTPN14,PTPN4,PTPRD,PTPRJ,PXN,SMAD3,SMAD4,TCF3,TCF7L2,TGFB1,TGFB1,TGFB2,YWHAB,YWHAQ,YWHAZ                                                      |
| Integrin Signaling                       | 8.23 | 0.195 | ACTB,ACTG1,ACTR2,ACTR3,AKT3,ARF3,ARF4,ARHGAP5,ARPC5,ASAP1,BRAF,CAV1,CRK,CRKL,GSK3B,ITGA2,ITGA3,ITGA5,ITGA6,ITGAV,ITGB8,KRAS,MAP2K4,MAPK1,MAPK8,MYLK3,NRAS,PIK3C2A,PIK3C2B,PIK3CA,PIK3R1,PPP1R12A,PTEN,PXN,RAC1,RAP2A,RHOB,TLN1,VCL,WASL                                                                                                                                                                                                                    |
| HIPPO signaling                          | 8.21 | 0.286 | BTRC,CSNK1D,CSNK1E,CUL1,LATS1,LATS2,MOB1A,NF2,PARD3,PPP1CC,PPP1R12A,PPP2R2A,PPP2R5C,SMAD2,SMAD3,SMAD4,SMAD5,STK4,TEAD1,WWTR1,YWHAB,YWHAQ,YWHAZ                                                                                                                                                                                                                                                                                                             |
| Rac Signaling                            | 8.1  | 0.242 | ABI2,ACTR2,ACTR3,ARPC5,CDK5R1,CFL2,ELK4,ITGA2,ITGA3,ITGA5,ITGA6,ITGAV,JUN,KRAS,LIMK1,MAP2K4,MAPK1,MAPK8,NCKAP1,NFKB1,NRAS,PARD3,PIK3C2A,PIK3C2B,PIK3CA,PIK3R1,RAC1,RAP2A,TIAM1                                                                                                                                                                                                                                                                             |
| Cell Cycle: G1/S Checkpoint Regulation   | 8.1  | 0.318 | ATM,BTRC,CCND1,CCND2,CDK6,CDKN1A,CDKN1B,CUL1,E2F1,E2F3,E2F5,E2F7,FOXO1,GSK3B,MDM2,MYC,RBL2,SMAD3,SMAD4,TGFB1,TP53                                                                                                                                                                                                                                                                                                                                          |
| Reelin Signaling in Neurons              | 8.03 | 0.24  | ACTR2,ACTR3,AFDN,AKT3,APP,ARHGEF10,ARPC5,CDK5R1,CRK,CRKL,FRK,GSK3B,ITGA3,ITGA5,LIMK1,MAP1B,MAP2K4,MAP3K9,MAPK1,MAPK8,PAFAH1B1,PAFAH1B2,PIK3C2A,PIK3C2B,PIK3CA,PIK3R1,RAC1,WASL,YES1                                                                                                                                                                                                                                                                        |
| RAN Signaling                            | 8.02 | 0.647 | CSE1L,KPNA1,KPNA2,KPNA5,KPNA6,KPNB1,RAN,RANBP2,RANGAP1,TNPO1,XPO1                                                                                                                                                                                                                                                                                                                                                                                          |
| Role of Tissue Factor in Cancer          | 7.93 | 0.243 | AKT3,CCN2,CFL2,CXCL8,EGFR,F3,FRK,GNA13,ITGA3,ITGA6,ITGAV,KRAS,LIMK1,MAPK1,MAPK14,NRAS,PIK3C2A,PIK3C2B,PIK3CA,PIK3R1,PTEN,RAC1,RAP2A,RPS6KA3,RPS6KA5,TP53,VEGFA,YES1                                                                                                                                                                                                                                                                                        |
| Cardiac Hypertrophy Signaling (Enhanced) | 7.93 | 0.142 | ACVR1B,ACVR2A,ACVR2B,AKT3,ATF2,ATP2A2,BMPR2,CALM1 (includes others),CTNNB1,CXCL8,EIF2B2,EP300,FGF2,FGFR1,FZD6,GDE1,GNA13,GNAI3,GNB1,GNG11,GSK3B,IGF1R,IL6,IL6ST,ITGA2,ITGA3,ITGA5,ITGA6,ITGAV,ITPR1,JUN,KRAS,MAP2K4,MAP3K2,MAP3K20,MAP3K7,MAP3K8,MAP3K9,MAPK1,MAPK14,MAPK8,MEF2D,MKNK2,MYC,NFAT5,NFATC3,NFKB1,NRAS,PDE3A,PDE4D,PDE7A,PIK3C2A,PIK3C2B,PIK3CA,PIK3R1,PRKAR2A,PRKCB,PTEN,PTGS2,RAP2A,RCAN1,RPS6KA5,STAT3,TGFB1,TGFB1,TGFB2,TGFB3,TNFSF9,WNT5A |
| Glucocorticoid Receptor Signaling        | 7.55 | 0.143 | ACTB,AKT3,ARID1A,BCL2,BCL2L11,CAV1,CDKN1A,CDKN1C,CREB1,CREBBP,CREBZF,CXCL8,DUSP1,EGFR,EP300,FOS,GTF2H1,HSP90A                                                                                                                                                                                                                                                                                                                                              |

|                                                   |      |       |                                                                                                                                                                                                                                                                                                                                |
|---------------------------------------------------|------|-------|--------------------------------------------------------------------------------------------------------------------------------------------------------------------------------------------------------------------------------------------------------------------------------------------------------------------------------|
|                                                   |      |       | A1,HSP90AB1,HSP90B1,HSPA1A/HSPA1B,HSPA5,HSPA8,IL6,IL6ST,JUN,KRAS,MAP2K4,MAP3K7,MAPK1,MAPK14,MAPK8,MYC,NCOA2,NCOA3,NCOR2,NFAT5,NFATC3,NFKB1,NR3C1,NRAS,PHF10,PIK3C2A,PIK3C2B,PIK3CA,PIK3R1,POLR2D,PRKAA1,PRKAA2,PRKAB2,PTGS2,RAC1,RAP2A,RPS6KA5,SER-PINE1,SMAD2,SMAD3,SMAD4,SMARCD1,STAT1,STAT3,TGFB1,TGFB R1,TGFB2,TSC22D3     |
| STAT3 Pathway                                     | 7.54 | 0.222 | BCL2,BMPR2,CDKN1A,EGFR,FGF2,FGFR1,IGF1R,IL6ST,KRAS,MAP2K4,MAP3K20,MAP3K21,MAP3K9,MAPK1,MAPK14,MAPK8,MYC,NRAS,NTRK2,RAC1,RAP2A,SOCS5,SOCS6,SOCS7,STAT3,TGFB1,TGFB R1,TGFB2,TGFB3,VEGFA                                                                                                                                          |
| Tumor Microenvironment Pathway                    | 7.54 | 0.2   | AKT3,BCL2,BRAF,CCND1,CD274,COL1A1,CXCL8,FAS,FGF2,FOS,FOXO1,HIF1A,IL6,ITGA5,JUN,KRAS,MAPK1,MMP14,MYC,NFKB1,NRAS,PIK3C2A,PIK3C2B,PIK3CA,PIK3R1,PTGS2,RAC1,RAP2A,SLC16A1,SLC1A4,SLC2A3,STAT3,TGFB1,TIAM1,VEGFA                                                                                                                    |
| ERK5 Signaling                                    | 7.41 | 0.292 | ATF2,CREB1,CREBBP,EGFR,ELK4,FOS,GNA13,IL6ST,KRAS,MAP3K2,MAP3K8,MEF2D,MYC,NRAS,RAP2A,RPS6KA3,RPS6KA5,YWHAB,YWHAQ,YWHAZ                                                                                                                                                                                                          |
| Signaling by Rho Family GTPases                   | 7.24 | 0.172 | ACTB,ACTG1,ACTR2,ACTR3,ARHGEF10,ARPC5,CDH1,CFL2,CLIP1,EZR,FOS,GNA13,GNAI3,GNB1,GNG11,GNG12,ITGA2,ITGA3,ITGA5,ITGA6,ITGAV,JUN,LIMK1,MAP2K4,MAP3K20,MAP3K21,MAP3K9,MAPK1,MAPK8,MSN,NFKB1,PARD3,PIK3C2A,PIK3C2B,PIK3CA,PIK3R1,PPP1R12A,RAC1,RHOB,SEPTIN11,SEPTIN2,SLC9A1,WASL                                                     |
| Cell Cycle: G2/M DNA Damage Checkpoint Regulation | 7.21 | 0.347 | ATM,BTRC,CCNB1,CDKN1A,CUL1,EP300,HIPK2,MDM2,MDM4,PPM1D,PRKDC,TP53,WEE1,YWHAB,YWHAQ,YWHAZ                                                                                                                                                                                                                                       |
| Synaptogenesis Signaling Pathway                  | 7.19 | 0.16  | ACTR2,ACTR3,AFDN,AKT3,AP2B1,ARPC5,ATF2,BRAF,CALM1 (includes others),CDH1,CREB1,CREBBP,CRK,CRKL,CTNNB1,CTNND1,DNAJC5,EFNA1,EIF4EBP2,EPHA4,GOSR1,GSK3B,HSPA8,ITPR1,KRAS,LIMK1,MAP1B,MAPK1,MAPK14,MARCKS,NAP1L1,NRAS,NTRK2,PAFAH1B1,PIK3C2A,PIK3C2B,PIK3CA,PIK3R1,PRKAR2A,RAB5B,RAB5C,RAC1,RAP2A,STX16,THBS1,TIAM1,TLN1,WASL,YES1 |
| Prolactin Signaling                               | 7.17 | 0.272 | CREBBP,EP300,FOS,IRF1,JUN,KRAS,MAPK1,MYC,NR3C1,NRAS,PIK3C2A,PIK3C2B,PIK3CA,PIK3R1,PRKCB,RAP2A,SOCS5,SOCS6,SOCS7,STAT1,STAT3                                                                                                                                                                                                    |
| Sertoli Cell-Sertoli Cell Junction Signaling      | 7.16 | 0.189 | ACTB,ACTG1,AFDN,AKT3,ATF2,CDH1,CLDN1,CTNNA1,CTNNB1,GSK3B,ITGA2,ITGA3,ITGA5,ITGA6,ITGAV,JUN,KRAS,MAP2K4,MAP3K2,MAP3K20,MAP3K7,MAP3K8,MAP3K9,MAPK1,MAPK14,MAPK8,NRAS,PRKAR2A,PTEN,RAC1,RAP2A,SPTBN1,TGFB3,TJP1,TUBB,VCL                                                                                                          |
| RAR Activation                                    | 7.05 | 0.188 | ACTB,AKT3,ARID1A,BMP2,CARM1,CREBBP,CSNK2A1,DUSP1,EP300,FOS,GTF2H1,JUN,MAP2K4,MAPK1,MAPK14,MAPK8,NCOR2,NFKB1,NSD1,PARP1,PHF10,PIK3CA,PIK3R1,PRKAR2A,PRKCB,PTEN,RAC1,REL,SMAD2,SMAD3,SMAD4,SMAD5,SMAD7,SMARCD1,TGFB1,VEGF                                                                                                        |

A

\*-log(B-H p-value) >= 1.3 indicates a significant pathway.

**Supplementary Table S4.** Enriched ingenuity pathway analysis pathways for the intersection of the predicted target genes of miR-15b-5p and miR-92b-3p.

| Ingenuity Canonical Pathways                                                  | -log(B-H p-value)* | Ratio  | Molecules                                                                                                                                         |
|-------------------------------------------------------------------------------|--------------------|--------|---------------------------------------------------------------------------------------------------------------------------------------------------|
| Molecular Mechanisms of Cancer                                                | 5                  | 0.0636 | CDK6,CHEK1,CREBBP,CRK,CTNNB1,E2F3,FADD,FZD6,GNAI3,GNAQ,GRB2,GSK3B,ITGA6,MAP2K4,MAP3K7,MAPK1,MDM2,PRKAR2A,RBPJ,SMAD2,SMAD3,SMAD7,SYNGAP1,TAB2,TCF3 |
| Regulation of the Epithelial-Mesenchymal Transition Pathway                   | 3.2                | 0.0733 | CTNNB1,FGF2,FZD6,GRB2,GSK3B,HMGA2,MAP2K4,MAPK1,PARD6B,RBPJ,SMAD2,SMAD3,SMURF1,TCF3                                                                |
| TGF-β Signaling                                                               | 3.2                | 0.104  | CREBBP,GRB2,MAP2K4,MAP3K7,MAPK1,SKI,SMAD2,SMAD3,SMAD7,SMURF1                                                                                      |
| Regulation Of The Epithelial Mesenchymal Transition By Growth Factors Pathway | 3.2                | 0.0745 | FGF2,GRB2,GSK3B,HMGA2,LATS1,LATS2,MAP2K4,MAP3K7,MAPK1,PARD6B,SMAD2,SMAD3,SMURF1,TCF3                                                              |

|                                                            |      |        |                                                                                                                                          |
|------------------------------------------------------------|------|--------|------------------------------------------------------------------------------------------------------------------------------------------|
| EIF2 Signaling                                             | 2.82 | 0.066  | AGO4, EIF2B2, EIF3A, EIF4G2, EIF5B, GRB2, GSK3B, HNRNPA1, MAPK1, PPP1CB, PTBP1, RPLP0, RPS14, RPS3A                                      |
| Senescence Pathway                                         | 2.82 | 0.0588 | ANAPC13, ASXL2, CDC27, CDK6, CHEK1, CREBBP, E2F3, MAP2K4, MAP3K7, MAPK1, MDM2, PHF19, RBL2, SMAD2, SMAD3, SMAD7                          |
| Protein Kinase A Signaling                                 | 2.63 | 0.0494 | AKAP10, ANAPC13, CDC27, CREBBP, CTNNB1, DUSP6, GNAI3, GNAQ, GNB2, GSK3B, ITPR1, MAPK1, PPP1CB, PRKAR2A, PTPRJ, SMAD3, TCF3, YWHAB, YWHAE |
| Inhibition of ARE-Mediated mRNA Degradation Pathway        | 2.63 | 0.082  | AGO4, CNOT4, DDX6, MAP3K7, MAPK1, PABPN1, PRKAR2A, XRN1, YWHAB, YWHAE                                                                    |
| Coronavirus Pathogenesis Pathway                           | 2.63 | 0.0753 | E2F3, MAP2K4, MAPK1, NPM1, RBL2, RPS14, RPS3A, SMAD3, TNPO1, TNPO2, TRAF3                                                                |
| Telomere Extension by Telomerase                           | 2.51 | 0.267  | HNRNPA1, HNRNPA2B1, TNKS2, XRCC5                                                                                                         |
| BMP signaling pathway                                      | 2.51 | 0.0964 | CREBBP, GRB2, MAP2K4, MAP3K7, MAPK1, PRKAR2A, SMAD7, SMURF1                                                                              |
| MSP-RON Signaling In Cancer Cells Pathway                  | 2.51 | 0.0752 | CREBBP, CTNNB1, GRB2, GSK3B, ITGA6, MAPK1, SMAD2, TCF3, YWHAB, YWHAE                                                                     |
| Insulin Receptor Signaling                                 | 2.46 | 0.0735 | CRK, CRKL, EIF2B2, GRB2, GSK3B, IRS4, MAPK1, PPP1CB, PRKAR2A, SYNJ1                                                                      |
| Role of PKR in Interferon Induction and Antiviral Response | 2.36 | 0.0783 | FADD, HSPA1A/HSPA1B, IRF1, MAP2K4, MAP3K7, MAPK1, NPM1, TAB2, TRAF3                                                                      |
| IL-1 Signaling                                             | 2.34 | 0.087  | GNAI3, GNAQ, GNB2, MAP2K4, MAP3K7, MAPK1, PRKAR2A, TAB2                                                                                  |
| PPARα/RXRα Activation                                      | 2.18 | 0.0615 | CAND1, CREBBP, FASN, GNAQ, GRB2, MAP2K4, MAP3K7, MAPK1, PRKAR2A, SMAD2, SMAD3                                                            |
| PI3K/AKT Signaling                                         | 2.14 | 0.0601 | CTNNB1, GRB2, GSK3B, IL6ST, ITGA6, MAPK1, MCL1, MDM2, SYNJ1, YWHAB, YWHAE                                                                |
| HOTAIR Regulatory Pathway                                  | 2.14 | 0.0641 | AGO4, CREBBP, CTNNB1, IRF1, JARID2, KMT2A, KMT2C, MDM2, STK38, TCF3                                                                      |
| Ephrin Receptor Signaling                                  | 2.13 | 0.0588 | ADAM10, CREBBP, CRK, CRKL, GNAI3, GNAQ, GNB2, GRB2, ITGA6, MAPK1, SDC2                                                                   |
| HIPPO signaling                                            | 2.01 | 0.0833 | LATS1, LATS2, PPP1CB, SMAD2, SMAD3, YWHAB, YWHAE                                                                                         |
| FGF Signaling                                              | 2.01 | 0.0833 | CREBBP, CRK, CRKL, FGF2, GRB2, ITPR1, MAPK1                                                                                              |
| Huntington's Disease Signaling                             | 1.94 | 0.0513 | CDK5R1, CLTC, CREBBP, GNAQ, GNB2, GRB2, HSPA1A/HSPA1B, HTT, ITPR1, MAP2K4, MAPK1, NSF                                                    |
| ERK/MAPK Signaling                                         | 1.94 | 0.0547 | CREBBP, CRK, CRKL, DUSP6, GRB2, ITGA6, MAPK1, PLA2G12A, PPP1CB, PRKAR2A, YWHAB                                                           |
| Cell Cycle: G1/S Checkpoint Regulation                     | 1.9  | 0.0909 | CDK6, E2F3, GSK3B, MDM2, RBL2, SMAD3                                                                                                     |
| Role of NFAT in Cardiac Hypertrophy                        | 1.85 | 0.0521 | GNAI3, GNAQ, GNB2, GRB2, GSK3B, IL6ST, ITPR1, MAP2K4, MAP3K7, MAPK1, PRKAR2A                                                             |
| PFKFB4 Signaling Pathway                                   | 1.85 | 0.109  | CREBBP, FGF2, MAP2K4, MAPK1, PRKAR2A                                                                                                     |
| Reelin Signaling in Neurons                                | 1.84 | 0.0661 | CDK5R1, CRK, CRKL, GSK3B, MAP1B, MAP2K4, MAPK1, PAFAH1B1                                                                                 |
| Melatonin Signaling                                        | 1.82 | 0.0857 | GNAI3, GNAQ, MAP2K4, MAPK1, PRKAR2A, RORA                                                                                                |
| ERK5 Signaling                                             | 1.78 | 0.0833 | CREBBP, ELK4, GNAQ, IL6ST, YWHAB, YWHAE                                                                                                  |
| Cell Cycle: G2/M DNA Damage Checkpoint Regulation          | 1.78 | 0.102  | CHEK1, MDM2, WEE1, YWHAB, YWHAE                                                                                                          |
| Myc Mediated Apoptosis Signaling                           | 1.75 | 0.1    | CREBBP, FADD, MCL1, MDM2, PRKAR2A                                                                                                        |
| Sumoylation Pathway                                        | 1.71 | 0.0693 | CBX4, CREBBP, MAP2K4, MDM2, RAN, SP3, ZNF217                                                                                             |
| Human Embryonic Stem Cell Pluripotency                     | 1.69 | 0.0606 | CTNNB1, FGF2, FZD6, GSK3B, SMAD2, SMAD3, SMAD7, TCF3                                                                                     |
| Regulation of eIF4 and p70S6K Signaling                    | 1.69 | 0.0556 | AGO4, EIF2B2, EIF3A, EIF4G2, GRB2, ITGA6, MAPK1, RPS14, RPS3A                                                                            |
| Hepatic Fibrosis Signaling Pathway                         | 1.69 | 0.0407 | CREBBP, CTNNB1, FGF2, FZD6, GNAI3, GSK3B, ITGA6, MAP2K4, MAP3K7, MAPK1, PRKAR2A, SMAD2, SMAD3, SMAD7, TCF3                               |
| Paxillin Signaling                                         | 1.64 | 0.066  | ARF1, CRK, GRB2, ITGA6, MAP2K4, MAPK1, VCL                                                                                               |
| Cardiac Hypertrophy Signaling                              | 1.62 | 0.0468 | CREBBP, EIF2B2, GNAI3, GNAQ, GNB2, GRB2, GSK3B, MAP2K4, MAP3K7, MAPK1, PRKAR2A                                                           |
| GNRH Signaling                                             | 1.62 | 0.0529 | CREBBP, GNAI3, GNAQ, GRB2, ITPR1, MAP2K4, MAP3K7, MAPK1, PRKAR2A                                                                         |

|                                                |      |        |                                                                                  |
|------------------------------------------------|------|--------|----------------------------------------------------------------------------------|
| RAN Signaling                                  | 1.62 | 0.176  | KPNA5,RAN,TNPO1                                                                  |
| Wnt/ $\beta$ -catenin Signaling                | 1.62 | 0.0529 | APPL1,CREBBP,CTNNB1,FZD6,GNAQ,GSK3B,MAP3K7,MDM2,TCF3                             |
| Synaptogenesis Signaling Pathway               | 1.62 | 0.0423 | CREBBP,CRK,CRKL,CTNNB1,GRB2,GSK3B,ITPR1,MAP1B,MAPK1,NSF,PAFAH1B1,PRKAR2A,SYNGAP1 |
| Integrin Signaling                             | 1.61 | 0.0488 | ARF1,CRK,CRKL,GRB2,GSK3B,ITGA6,MAP2K4,MAPK1,PPP1CB,VCL                           |
| Insulin Secretion Signaling Pathway            | 1.61 | 0.046  | AGO4,CREBBP,EIF2B2,EIF4G2,GNAQ,ITPR1,MAPK1,NSF,PRKAR2A,SPCS3,TCF3                |
| Opioid Signaling Pathway                       | 1.55 | 0.0451 | CLTC,CREBBP,CTNNB1,GNAI3,GSK3B,ITPR1,MAP2K4,MAPK1,OGFR,PRKAR2A,SLC12A5           |
| Factors Promoting Cardiogenesis in Vertebrates | 1.55 | 0.0552 | CREBBP,CTNNB1,FZD6,GSK3B,MAP2K4,MAP3K7,SMAD2,TCF3                                |
| PDGF Signaling                                 | 1.55 | 0.0698 | CRK,CRKL,GRB2,MAP2K4,MAPK1,SYNJ1                                                 |
| Endocannabinoid Developing Neuron Pathway      | 1.55 | 0.0609 | CREBBP,CTNNB1,GNAI3,GSK3B,MAP2K4,MAPK1,PRKAR2A                                   |
| Necroptosis Signaling Pathway                  | 1.43 | 0.0523 | FADD,FKBP1A,MAP3K7,MDM2,PLA2G12A,RBL2,TAB2,VDAC2                                 |
| Actin Cytoskeleton Signaling                   | 1.42 | 0.045  | ABI2,CRK,CRKL,FGF2,GRB2,ITGA6,MAPK1,PPP1CB,SLC9A1,VCL                            |
| $\alpha$ -Adrenergic Signaling                 | 1.4  | 0.0638 | GNAI3,GNAQ,GNB2,ITPR1,MAPK1,PRKAR2A                                              |
| Sertoli Cell-Sertoli Cell Junction Signaling   | 1.4  | 0.0474 | CTNNB1,GSK3B,ITGA6,MAP2K4,MAP3K7,MAPK1,PRKAR2A,SYMPK,VCL                         |
| ATM Signaling                                  | 1.38 | 0.0625 | CBX5,CHEK1,CREBBP,MAP2K4,MDM2,RNF168                                             |

\*-log(B-H p-value)  $\geq$  1.3 indicates a significant pathway.
